# Supplementary material
Source: publisher figshare collection journal article supplement (https://tandf.figshare.com/ndownloader/files/17520008)
Supplement: Supplementary file 1 [file 17520008]

ERAS pathway versus conventional care

|  | ERAS | Conventional protocol |
| --- | --- | --- |
| Preoperative counseling | Patient education about ERAS before surgery  Conducted by a multidisciplinary team | Routine preoperative counseling |
| Bowel preparation | Two boxes of SF-PEG for stomach surgery  Three boxes of SF-PEG for colorectal surgery | The same to ERAS program |
| Preoperative carbohydrates Intaking | Maltodextrin drink 400 mL 12 to 2 hours before surgery | Fasting from midnight of the day before surgery |
| Preoperative oral probiotics | Clostridium Butyricum Tablets  Bacillus Licheniformis Capsule | No |
| Surgical procedures | As far as possible using laparoscopy to minimize trauma | No special requirement |
| Maintain of intraoperative normothermia | Body temperature maintained at 36°C | No special requirement |
| Postoperative algiatry | Nonsteroidal analgesics were routinely used for postoperation and two days after surgery | Use analgesic pump or use tramadol analgesic temporarily |
| Nausea and vomiting prevention | Ondansetron 4mg for POD 0 and POD 1 | Apply when symptoms appear |
| Urethral catheter removal | After 24 h (48 h for ultra-low resection ) | After urethral clamping training (about 48–72 h later) |
| Abdominal drain removal | Day 3 after colorectal surgery  Day 4 after stomach surgery | Surgeon’s decision |
| Nasogastric tube removal | At the end of surgery | At recovery of bowel canalization |
| Start of oral meal | Drinking water on POD 1 after gastrectomy  Enteral Nutritional Suspension on POD 2, POD 3 after gastrectomy and POD 1, POD 2 after colorectal surgery  And then the semi-fluid diet | Oral intake initiated after flatus (following a stepwise plan from water to other liquids to semifluid to normal food) |
| Mobilization | POD 1 2h out of bed and ward ambulation ＞300 m  POD 2 4h out of bed and ward ambulation ＞500 m  POD 3 6h out of bed and ward ambulation ＞1000 m  And then normal activity | POD 1 no mobilization  POD 2 mobilize in bed  POD 3 encourage mobilization out of bed  And then ward ambulation |
| Standardized discharge criteria | Solid diet well tolerated  Recovery of bowel function  No evidence or suspicious of complications  No symptoms (nausea/vomiting/dizziness)  Tolerable postoperative pain without analgesics or with oral analgesics only  Patient desires to be discharged | No standardized discharge criteria—at the surgeons discretion |

ERAS Enhanced Recovery After Surgery; POD Postoperative Day; SF-PEG Sulfate-free Polyethylene Glycol Electrolyte Powder
